# Supplementary material for: ADRB2 polymorphism Arg16Gly modifies the natural outcome of heart failure and dictates therapeutic response to β-blockers in patients with heart failure
Source: PubMed Central journal article supplement (PMC6198009; doi:10.1038/s41421-018-0058-6), 2018-10-23
Supplement: 41421_2018_58_MOESM1_ESM.pdf [file 41421_2018_58_MOESM1_ESM.pdf]

## Supplementary Information

**Table S1. Frequency Distribution of  $\beta$ -AR Signaling Pathway Polymorphisms in Our Chinese Han Population Determined by Sequencing**

| Gene  | AA change | Allele change | Type of variant | MAF in patients with HF (%) | MAF in healthy controls (%) |
|-------|-----------|---------------|-----------------|-----------------------------|-----------------------------|
| ADRB1 | Arg389Gly | C>G           | missense        | 18.8                        | 25.0                        |
| ADRB2 | Arg16Gly  | A>G           | missense        | 42.3                        | 43.9                        |
| ADRB2 | Gln27Glu  | C>G           | missense        | 12.5                        | 9.8                         |
| ADRB2 | Leu84Leu  | G>A           | synonymous      | 32.6                        | 33.8                        |
| ADRB2 | Arg175Arg | C>A           | synonymous      | 30.7                        | 33.3                        |
| ADRB2 | Gly354Gly | G>C           | synonymous      | 41.7                        | 35.1                        |
| ADRB2 | Leu413Leu | G>A/T         | synonymous      | 41.1                        | 31.9                        |
| GRK5  | Gln41Leu  | A>T           | missense        | 2.1                         | 2.6                         |
| GRK5  | Ile62Ile  | C>T           | synonymous      | 4.6                         | 5.1                         |
| GRK5  | Asn280Asn | C>T           | synonymous      | 6.3                         | 3.4                         |
| GRK5  | Arg304His | G>A           | missense        | 18.8                        | 25.0                        |

Abbreviations: AA, amino acid; AR, adrenergic receptor; HF, heart failure; MAF, minor allele frequency.

**Table S2. Clinical Characteristics of the patients in replicated stage**

| Characteristics                        | All patients    | Patients with<br>AA genotype | Patients with<br>AG /GG genotype | P Value* |
|----------------------------------------|-----------------|------------------------------|----------------------------------|----------|
|                                        | (N=919)         | (N=324)                      | (N=595)                          |          |
| Age (years)                            | 61.0±12.7       | 60.8±12.4                    | 61.0±12.8                        | 0.377    |
| Male sex <sup>§</sup>                  | 582 (63.3)      | 212 (65.4)                   | 370 (62.2)                       | 0.329    |
| NYHA functional class <sup>§</sup>     |                 |                              |                                  |          |
| II                                     | 474 (51.6)      | 166 (51.2)                   | 308 (51.8)                       | 0.958    |
| III                                    | 327 (35.6)      | 115 (35.5)                   | 212 (35.6)                       |          |
| IV                                     | 118 (12.8)      | 43 (13.3)                    | 75 (12.6)                        |          |
| Personal history <sup>§</sup>          |                 |                              |                                  |          |
| Smoking                                | 313 (34.1)      | 114 (35.2)                   | 199 (33.4)                       | 0.595    |
| Hypertension                           | 526 (57.2)      | 178 (54.9)                   | 348 (58.5)                       | 0.299    |
| Hyperlipidemia                         | 321 (34.9)      | 109 (33.6)                   | 212 (35.6)                       | 0.546    |
| Diabetes                               | 234 (25.5)      | 94 (29.0)                    | 140 (23.5)                       | 0.068    |
| Stroke                                 | 74 (8.1)        | 26 (8.0)                     | 48 (8.1)                         | 0.982    |
| Clinical testing                       |                 |                              |                                  |          |
| Systolic pressure (mmHg)               | 133.3±24.4      | 134.6±24.7                   | 132.5±24.3                       | 0.366    |
| Diastolic pressure (mmHg)              | 79.6±15.0       | 80.0±15.2                    | 79.4±14.8                        | 0.858    |
| Heart Rate (beats/min)                 | 80.8±18.2       | 80.9±18.4                    | 80.8±18.1                        | 0.659    |
| Serum creatinine (μmol/l) <sup>†</sup> | 80 (62-102)     | 81 (62-104)                  | 80 (62-101)                      | 0.309    |
| NT-proBNP (pg/ml) <sup>†</sup>         | 1825 (462-5931) | 1695 (408-5903)              | 1888 (556-5946)                  | 0.760    |
| LVEDD (mm) <sup>†</sup>                | 52 (46-62)      | 51 (46-63)                   | 52 (46-61)                       | 0.829    |
| LAD (mm) <sup>†</sup>                  | 38 (33-44)      | 38 (33-44)                   | 39 (33-45)                       | 0.990    |

|                                    |            |            |            |       |
|------------------------------------|------------|------------|------------|-------|
| Ejection fraction (%) <sup>†</sup> | 56 (36-65) | 56 (36-65) | 56 (36-66) | 0.961 |
| Medication - (%)                   |            |            |            |       |
| Digoxin                            | 145 (15.8) | 48 (14.8)  | 97 (16.3)  | 0.554 |
| Diuretics                          | 380 (41.3) | 129 (39.8) | 251 (42.2) | 0.486 |
| ACEI                               | 518 (56.4) | 175 (54.0) | 343 (57.6) | 0.288 |
| ARB                                | 74 (8.1)   | 31 (9.6)   | 43 (7.2)   | 0.213 |
| Beta-blocker                       | 432 (47.0) | 153 (47.2) | 279 (46.9) | 0.923 |
| Spironolactone                     | 355 (39.9) | 116 (37.4) | 239 (41.3) | 0.263 |

---

\*For similarity among the different genotypes. <sup>§</sup>Listed as number (%). <sup>†</sup>Interquartile range included in parentheses. Abbreviations: ACEI, angiotensin-converting enzyme inhibitor; ARB, Angiotensin receptor blockers; LAD, left atrial dimension; LVEDD, left ventricular end-diastolic dimension; NT-proBNP, the N-terminal pro-hormone of brain natriuretic peptide; NYHA, New York Heart Association.

**Table S3. Cox-Regression of the Clinical Factors Affecting the Primary End Point in the Entire Study Cohort**

| <b>Variables</b>  | <b>HR</b> | <b>95% CI</b> | <b>P value</b> |
|-------------------|-----------|---------------|----------------|
| Age               | 1.02      | 1.01 to 1.03  | <0.001         |
| Gender            | 1.05      | 0.85 to 1.28  | 0.671          |
| Smoking           | 1.05      | 0.86 to 1.28  | 0.632          |
| Hypertension      | 1.07      | 0.79 to 1.46  | 0.647          |
| Hyperlipidemia    | 0.99      | 0.80 to 1.24  | 0.952          |
| Diabetes          | 1.53      | 1.26 to 1.86  | <0.001         |
| Stroke            | 0.80      | 0.59 to 1.08  | 0.139          |
| Etiology*         | 1.28      | 1.05 to 1.56  | 0.013          |
| NYHA <sup>§</sup> | 3.04      | 2.39 to 3.87  | <0.001         |
| NT-proBNP         | 1.55      | 1.45 to 1.67  | <0.001         |

All of the data presented in this table are univariate Cox proportional hazards. \*HR of etiology, calculated by comparing nonischemic versus ischemic HF. <sup>§</sup>HR of NYHA functional class, calculated by comparing class III + class IV versus class II HF. Abbreviations: CI, confidence interval; HF, heart failure; HR, hazard ratio; NT-pro-BNP, the N-terminal pro-hormone of brain natriuretic peptide; NYHA, New York Heart Association.

**Table S4. Primary and Secondary End Points, According to Genotypes of Polymorphisms in the Pathway**

| <b>Gene and Genotype</b>     | <b>Primary End Point</b> | <b>All-cause Deaths</b> | <b>Cardiovascular Hospitalization</b> | <b>Recurrence of Heart Failure</b> |
|------------------------------|--------------------------|-------------------------|---------------------------------------|------------------------------------|
| GRK5 Gln41Leu A>T - no. (%)  |                          |                         |                                       |                                    |
| AA                           | 411 (17.7)               | 437 (18.8)              | 696 (29.9)                            | 611 (26.3)                         |
| AT                           | 8 (13.6)                 | 11 (18.6)               | 11 (18.6)                             | 16 (27.1)                          |
| Log rank P value             | 0.303                    | 0.812                   | 0.029                                 | 0.71                               |
| GRK5 Arg304His G>A - no. (%) |                          |                         |                                       |                                    |
| GG                           | 233 (17.9)               | 255 (19.5)              | 379 (29.0)                            | 323 (24.8)                         |
| GA                           | 165 (17.7)               | 170 (18.2)              | 276 (29.6)                            | 257 (27.5)                         |
| AA                           | 21 (14.2)                | 23 (15.5)               | 53 (35.8)                             | 48 (32.4)                          |
| Log rank P value             | 0.422                    | 0.337                   | 0.276                                 | 0.101                              |
| ADRB1Arg389Gly C>G - no. (%) |                          |                         |                                       |                                    |
| CC                           | 40 (19.0)                | 45 (21.4)               | 55 (26.2)                             | 58 (27.6)                          |
| CG                           | 176 (17.5)               | 185 (18.4)              | 304 (30.3)                            | 270 (26.9)                         |
| GG                           | 201 (17.3)               | 215 (18.5)              | 346 (29.7)                            | 297 (25.5)                         |
| Log rank P value             | 0.973                    | 0.793                   | 0.349                                 | 0.679                              |
| ADRB2 Arg16Gly A>G - no. (%) |                          |                         |                                       |                                    |
| AA                           | 129 (14.0)               | 138 (15.0)              | 243 (26.4)                            | 226 (24.6)                         |
| AG                           | 209 (18.8)               | 226 (20.3)              | 355 (31.9)                            | 304 (27.3)                         |
| GG                           | 81 (22.8%)               | 84 (23.7)               | 110 (31.0)                            | 98 (27.6)                          |
| Log rank P value             | <0.001                   | <0.001                  | 0.010                                 | 0.215                              |
| ADRB2 Gln27Glu C>G - no. (%) |                          |                         |                                       |                                    |
| CC                           | 332 (17.2)               | 358 (18.5)              | 574 (29.7)                            | 517 (26.8)                         |
| CG                           | 39 (22.2)                | 41 (23.3)               | 52 (29.5)                             | 45 (25.6)                          |
| GG                           | 48 (17.1)                | 49 (17.5)               | 82 (29.3)                             | 66 (23.6)                          |

Log rank P value

0.114

0.146

0.993

0.66

---

P values are two-sided and were calculated by a stratified log-rank test without adjustment for comparisons for the clinical events.

**Table S5. Characteristics of Patients with Heart Failure Stratified by BB Use and *ADRB2* Arg16Gly A>G Genotype**

| Characteristics           | All Patients (N=2386) |                    | Patients with AA Genotype (N=919) |                   | Patients with AG Genotype (N=1112) |                   | Patients with GG Genotype (N=355) |                   |
|---------------------------|-----------------------|--------------------|-----------------------------------|-------------------|------------------------------------|-------------------|-----------------------------------|-------------------|
|                           | BB Use (N=1365)       | No BB Use (N=1021) | BB Use (N=534)                    | No BB Use (N=385) | BB Use (N=636)                     | No BB Use (N=476) | BB Use (N=195)                    | No BB Use (N=160) |
| Age (year)r               | 58.7±14.0*            | 60.1±15.2          | 58.6±14.1                         | 59.0±14.9         | 58.8±13.9§                         | 61.3±15.1         | 59.0±13.0                         | 59.3±16.1         |
| Male sex†                 | 933 (68.4)*           | 654 (64.1)         | 363 (68.0)                        | 249 (64.7)        | 446 (70.1)§                        | 298 (62.6)        | 124 (63.6)§                       | 107 (66.9)        |
| Ischemic etiology†        | 708 (51.9)*           | 426 (41.7)         | 279 (52.2)§                       | 171 (44.4)        | 330 (51.9)§                        | 193 (40.5)        | 99 (50.8)                         | 62 (38.8)         |
| NYHA functional class†    |                       |                    |                                   |                   |                                    |                   |                                   |                   |
| II                        | 665 (48.7)            | 369 (36.1)         | 263 (49.3)                        | 151 (39.2)        | 314 (49.5)                         | 161 (40.5)        | 88 (45.1)                         | 57 (35.6)         |
| III                       | 454 (33.3)*           | 353 (34.6)         | 182 (34.1)§                       | 134 (34.8)        | 206 (32.4)§                        | 169 (35.5)        | 66 (33.8)§                        | 50 (31.3)         |
| IV                        | 246 (18.0)            | 299 (29.3)         | 89 (16.7)                         | 100 (26.0)        | 116 (18.2)                         | 146 (30.7)        | 41 (21.0)                         | 53 (33.1)         |
| Personal history†         |                       |                    |                                   |                   |                                    |                   |                                   |                   |
| Smoking                   | 554 (40.6)            | 374 (36.6)         | 218 (40.8)                        | 145 (37.7)        | 265 (41.7)§                        | 165 (34.7)        | 71 (36.4)                         | 64 (40.0)         |
| Hypertension              | 1192 (87.3)           | 896 (87.8)         | 454 (85.0)                        | 322 (83.6)        | 566 (89.0)                         | 430 (90.3)        | 71 (36.4)                         | 64 (40.0)         |
| Hyperlipidemia            | 368 (27.0)*           | 226 (22.1)         | 145 (27.2)                        | 96 (24.9)         | 166 (26.1)§                        | 96 (20.2)         | 57 (29.2)                         | 34 (21.3)         |
| Diabetes                  | 419 (30.7)            | 340 (33.1)         | 165 (30.9)                        | 125 (32.5)        | 185 (29.1)                         | 163 (34.2)        | 69 (35.4)                         | 52 (32.5)         |
| Stroke                    | 131 (9.6)             | 115 (11.3)         | 59 (11.0)                         | 43 (11.2)         | 57 (9.0)                           | 56 (11.8)         | 15 (7.7)                          | 16 (10.0)         |
| Clinical testing          |                       |                    |                                   |                   |                                    |                   |                                   |                   |
| Systolic pressure (mmHg)  | 131.5±24.7            | 130.9±26.0         | 131.5±24.6                        | 132.4±26.1        | 132.3±25.4                         | 130.1±25.8        | 129±22.4                          | 130±26.4          |
| Diastolic pressure (mmHg) | 80.7±16.0             | 80.0±16.4          | 80.7±16.7                         | 80.9±16.9         | 81.1±15.7                          | 79.8±16.8         | 79.2±15.0                         | 77.8±13.7         |
| Heart Rate (beats/min)    | 82.6±18.8             | 84.0±21.8          | 82.2±18.2                         | 83.3±23.3         | 82.7±19.9                          | 84.8±20.9         | 83.3±16.9                         | 83.7±23.4         |

|                            |                  |                 |                  |                 |                  |                 |                 |                 |
|----------------------------|------------------|-----------------|------------------|-----------------|------------------|-----------------|-----------------|-----------------|
| Serum Creatinine (μmol/l)‡ | 84 (67-102)*     | 84 (67-117)     | 82 (67-103)      | 83 (65-111)     | 84 (69-102)§     | 86 (69-119)     | 84 (66-101)     | 85 (66-122)     |
| NT-proBNP (pg/ml)‡         | 1425 (307-4441)† | 2417 (608-7586) | 1582 (430-4114)§ | 2140 (547-6898) | 1286 (255-4365)§ | 2516 (731-7906) | 1576 (446-6427) | 2795 (299-8392) |
| LVEDD (mm)‡                | 54 (47-64)       | 55 (49-64)      | 54 (47-64)       | 54 (48-63)      | 55 (48-64)       | 56 (49-64)      | 55 (47-63)      | 57 (49-66)      |
| LAD (mm)‡                  | 40 (35-45)       | 40 (35-46)      | 39 (35-45)       | 39 (34-45)      | 39 (35-45)§      | 41 (36-46)      | 40 (36-45)      | 41 (36-46)      |
| Ejection fraction (%)‡     | 47 (32-62)       | 47 (33-60)      | 47 (32-61)       | 50 (35-61)      | 50 (32-62)§      | 45 (32-59)      | 44 (32-63)      | 44 (33-60)      |
| Medication†                |                  |                 |                  |                 |                  |                 |                 |                 |
| Digoxin                    | 351 (25.7)*      | 212 (20.8)      | 148 (27.7)§      | 66 (17.1)       | 160 (25.2)       | 114 (23.9)      | 43 (22.1)       | 32 (20.0)       |
| Diuretics                  | 679 (49.7)*      | 425 (41.6)      | 262 (49.1)§      | 140 (36.4)      | 314 (49.4)       | 213 (44.7)      | 103 (52.8)      | 72 (45.0)       |
| ACEI                       | 858 (62.9)*      | 388 (38.0)      | 320 (59.9)§      | 146 (37.9)      | 405 (63.7)§      | 179 (37.6)      | 133 (68.2)§     | 63 (39.4)       |
| ARB                        | 204 (14.9)*      | 75 (7.3)        | 77 (14.4)§       | 25 (6.5)        | 105 (16.5)§      | 37 (7.8)        | 22 (11.3)       | 13 (8.1)        |
| Spirinolactone             | 594 (43.5)*      | 344 (33.7)      | 238 (44.6)§      | 116 (30.1)      | 267 (42.0)§      | 170 (35.7)      | 89 (45.6)       | 58 (36.3)       |

\*P value <0.05 versus all patients not using BBs. §P value <0.05 versus patients the same genotype who are not using BBs. †Listed as number (%). ‡Interquartile range included in parentheses.

Abbreviations: ACEI, angiotensin-converting enzyme inhibitor; ARB, Angiotensin receptor blockers; BB, β-blocker; LAD, left atrial dimension; LVEDD, left ventricular end-diastolic dimension; NT-proBNP, the N-terminal pro-hormone of brain natriuretic peptide; NYHA, = New York Heart Association.



**Table S6. Characteristics of Heart Failure Subjects by  $\beta$ -blocker Use and *ADRB1* Arg389Gly C>G Genotype**

| Characteristics             | GG Genotype (N=210) |                     | CG Genotype (N=1003) |                      | CC Genotype (N=1164) |                      |
|-----------------------------|---------------------|---------------------|----------------------|----------------------|----------------------|----------------------|
|                             | BB Use<br>(N=123)   | No BB Use<br>(N=87) | BB Use<br>(N=573)    | No BB Use<br>(N=430) | BB Use<br>(N=666)    | No BB Use<br>(N=498) |
| Age - yr                    | 58.1±14.4           | 59.0±16.3           | 58.3±13.9            | 59.8±15.4            | 59.2±13.7            | 60.6±14.9            |
| Male sex - (%)              | 89 (72.4)           | 58 (66.7)           | 402 (70.2)*          | 264 (61.4)           | 439 (65.9)           | 328 (65.9)           |
| Ischemic etiology - (%)     | 61 (49.6)           | 33 (37.9)           | 268 (46.8)*          | 169 (39.3)           | 376 (56.5)*          | 220 (44.2)           |
| NYHA functional class - (%) |                     |                     |                      |                      |                      |                      |
| II                          | 45 (36.6)           | 28 (32.2)           | 276 (48.2)           | 158 (36.7)           | 343 (51.5)           | 180 (36.1)           |
| III                         | 49 (39.8)*          | 24 (27.6)           | 198 (34.6)*          | 150 (34.9)           | 205 (30.8)*          | 177 (35.5)           |
| IV                          | 29 (23.6)           | 35 (40.2)           | 99 (17.3)            | 122 (28.4)           | 118 (17.7)           | 141 (12.1)           |
| Personal history - (%)      |                     |                     |                      |                      |                      |                      |
| Smoking                     | 51 (41.5)           | 26 (29.9)           | 235 (41.0)*          | 147 (34.2)           | 267 (40.1)           | 198 (12.0)           |
| Hypertension                | 106 (86.2)          | 74 (85.1)           | 506 (88.3)           | 383 (89.1)           | 577 (86.6)           | 434 (87.1)           |
| Hyperlipidemia              | 37 (30.1)           | 23 (26.4)           | 154 (26.9)           | 97 (22.6)            | 176 (26.4)*          | 104 (20.9)           |
| Diabetes                    | 41 (33.3)           | 25 (28.7)           | 182 (31.8)           | 135 (31.4)           | 195 (29.3)*          | 178 (35.7)           |
| Stroke                      | 7 (5.7)             | 9 (10.3)            | 49 (8.6)             | 45 (10.5)            | 75 (11.3)            | 60 (12.0)            |
| Clinical testing            |                     |                     |                      |                      |                      |                      |
| Systolic pressure - mm Hg   | 131.3±23.9          | 131.6±26.8          | 131.8±24.9           | 129.6±25.2           | 131.2±24.7           | 132.0±26.5           |
| Diastolic pressure - mm Hg  | 81.5±16.2           | 80.3±15.9           | 81.0±16.7            | 80.0±16.9            | 80.2±15.3            | 80.0±16.2            |
| Heart Rate - beats/min      | 84.6±18.3           | 83.8±15.9           | 82.3±19.1            | 83.5±21.7            | 82.5±18.8            | 84.6±21.7            |
| Serum Creatinine - umol/L   | 86 (72-107)         | 83 (67-113)         | 84 (68-99)           | 83 (67-113)          | 83 (67-103)*         | 85 (67-121)          |

|                         |                 |                 |                  |                 |                  |                 |
|-------------------------|-----------------|-----------------|------------------|-----------------|------------------|-----------------|
| NT-proBNP - pg/mL       | 2458 (688-4780) | 2465 (706-9000) | 1510 (334-4615)* | 2556 (658-7797) | 1204 (253-3968)* | 2400 (498-7298) |
| LVEDD - mm              | 56 (47-66)      | 56 (48-67)      | 55 (48-65)       | 56 (49-64)      | 54 (47-62)*      | 55 (49-63)      |
| LAD - mm                | 41 (35-47)      | 42 (33-47)      | 40 (35-45)       | 40 (35-46)      | 39 (34-45)       | 40 (35-45)      |
| Ejection fraction - (%) | 44 (32-58)      | 47 (35-60)      | 45 (32-60)       | 46 (33-60)      | 50 (33-63)       | 47 (33-60)      |
| Medication - (%)        |                 |                 |                  |                 |                  |                 |
| Digoxin                 | 32 (26.0)       | 14 (16.1)       | 164 (28.6)*      | 91 (21.2)       | 155 (23.3)       | 107 (21.5)      |
| Diuretics               | 65 (52.8)       | 41 (47.1)       | 302 (52.7)*      | 177 (41.2)      | 310 (46.5)       | 205 (41.2)      |
| ACEI                    | 80 (65.0)*      | 35 (40.2)       | 360 (62.8)*      | 155 (36.0)      | 417 (62.6)*      | 197 (39.6)      |
| ARB                     | 17 (13.8)       | 8 (9.2)         | 78 (13.6)*       | 27 (6.3)        | 109 (16.4)*      | 37 (7.4)        |
| Spironolactone          | 57 (46.3)       | 35 (40.2)       | 268 (46.8)*      | 147 (34.2)      | 268 (40.2)*      | 161 (32.3)      |

NYHA = New York Heart Association; NT-proBNP = The N-terminal prohormone of brain natriuretic peptide; LVEDD =left ventricular end-diastolic dimension; LAD = left atrial dimension; BB = beta-blocker; ACEI = angiotensin-converting enzyme inhibitor; ARB = angiotensin receptor blocker

\* P value<0.05 versus patients with no BB use of the same genotype

**Table S7. Characteristics of Heart Failure Subjects by  $\beta$ -blocker Use and *ADRB2* Gln27Glu C>G Genotype**

| Characteristics             | CC Genotype (N=1930) |                      | CG Genotype (N=176) |                     | GG Genotype (N=280) |                      |
|-----------------------------|----------------------|----------------------|---------------------|---------------------|---------------------|----------------------|
|                             | BB Use<br>(N=1096)   | No BB Use<br>(N=834) | BB Use<br>(N=105)   | No BB Use<br>(N=71) | BB Use<br>(N=164)   | No BB Use<br>(N=116) |
| Age - yr                    | 58.8±13.8*           | 60.1±15.0            | 58.5±13.4           | 59.4±16.7           | 58.8±14.3           | 60.5±16.1            |
| Male sex - (%)              | 749 (68.3)*          | 527 (63.2)           | 71 (67.6)           | 54 (76.1)           | 113 (68.9)          | 73 (62.9)            |
| Ischemic etiology - (%)     | 571 (52.1)*          | 346 (41.5)           | 53 (50.5)           | 29 (40.8)           | 84 (51.2)           | 51 (44.0)            |
| NYHA functional class - (%) |                      |                      |                     |                     |                     |                      |
| II                          | 542 (49.5)           | 293 (35.1)           | 41 (39.0)           | 27 (38.0)           | 82 (50.0)           | 49 (42.2)            |
| III                         | 361 (32.9)*          | 301 (36.1)           | 43 (41.0)           | 23 (32.4)           | 50 (30.5)*          | 29 (25.0)            |
| IV                          | 193 (17.6)           | 240 (28.8)           | 21 (20.0)           | 21 (29.6)           | 32 (19.5)           | 38 (32.8)            |
| Personal history - (%)      |                      |                      |                     |                     |                     |                      |
| Smoking                     | 451 (41.1)*          | 302 (36.2)           | 40 (38.1)           | 32 (45.1)           | 63 (38.4)           | 40 (34.5)            |
| Hypertension                | 958 (87.4)           | 732 (87.8)           | 88 (83.8)           | 61 (85.9)           | 146 (89.0)          | 103 (88.8)           |
| Hyperlipidemia              | 283 (25.8)           | 191 (22.9)           | 33 (31.4)           | 14 (19.7)           | 52 (31.7)*          | 21 (18.1)            |
| Diabetes                    | 324 (29.6)*          | 284 (34.1)           | 37 (35.2)           | 18 (25.4)           | 58 (35.4)           | 38 (32.8)            |
| Stroke                      | 107 (9.8)            | 89 (10.7)            | 7 (6.7)             | 11 (15.5)           | 17 (10.4)           | 15 (12.9)            |
| Clinical testing            |                      |                      |                     |                     |                     |                      |
| Systolic pressure - mm Hg   | 131.7±24.9           | 130.9±25.9           | 128.7±23.1          | 130.8±22.1          | 132.4±24.5          | 130.8±29.0           |
| Diastolic pressure - mm Hg  | 80.7±16.1            | 79.7±15.8            | 79.6±15.5           | 81.2±14.9           | 80.7±15.3           | 80.7±20.9            |
| Heart Rate - beats/min      | 82.8±19.1            | 83.6±21.5            | 82.5±17.6           | 87.2±20.3           | 81.3±17.8           | 85.6±24.7            |
| Serum Creatinine - umol/L   | 83 (67-101)          | 83 (66-114)          | 83 (65-103)         | 91 (68-135)         | 87 (70-104)         | 92 (76-128)          |

|                         |                  |                 |                 |                 |                  |                 |
|-------------------------|------------------|-----------------|-----------------|-----------------|------------------|-----------------|
| NT-proBNP - pg/mL       | 1386 (307-4389)* | 2359 (590-7109) | 1997 (575-4894) | 2719 (500-9203) | 1186 (255-4567)* | 2764 (741-8897) |
| LVEDD - mm              | 54 (47-64)       | 55 (48-63)      | 55 (48-65)      | 58 (51-67)      | 55 (47-63)       | 57 (48-64)      |
| LAD - mm                | 39 (35-45)       | 40 (35-45)      | 41 (37-46)      | 41 (35-47)      | 39 (34-45)       | 41 (35-48)      |
| Ejection fraction - (%) | 48 (32-62)       | 47 (33-60)      | 40 (31-60)      | 42 (30-60)      | 49 (33-62)       | 48 (33-62)      |
| Medication - (%)        |                  |                 |                 |                 |                  |                 |
| Digoxin                 | 280 (25.5)*      | 172 (20.6)      | 26 (24.8)       | 12 (16.9)       | 45 (27.4)        | 28 (24.1)       |
| Diuretics               | 538 (49.1)*      | 337 (40.4)      | 60 (57.1)       | 30 (42.3)       | 81 (49.4)        | 58 (50.0)       |
| ACEI                    | 682 (62.2)*      | 318 (38.1)      | 65 (61.9)*      | 29 (40.8)       | 111 (67.7)*      | 41 (35.3)       |
| ARB                     | 162 (14.8)*      | 55 (6.6)        | 13 (12.4)       | 4 (5.6)         | 29 (17.7)        | 16 (13.8)       |
| Spironolactone          | 476 (43.4)*      | 278 (33.3)      | 52 (49.5)*      | 23 (32.4)       | 66 (40.2)        | 43 (37.1)       |

NYHA = New York Heart Association; NT-proBNP = The N-terminal prohormone of brain natriuretic peptide; LVEDD =left ventricular end-diastolic dimension; LAD = left atrial dimension; BB = beta-blocker; ACEI = angiotensin-converting enzyme inhibitor; ARB = angiotensin receptor blocker;

\* P value<0.05 versus patients with no BB use of the same genotype

**Table S8. Characteristics of Heart Failure Subjects by  $\beta$ -blocker Use and *GRK5* Gln41Leu A>T Genotype**

| Characteristics             | AA Genotype (N=2325) |                      | AT Genotype (N=59) |                     |
|-----------------------------|----------------------|----------------------|--------------------|---------------------|
|                             | BB Use<br>(N=1327)   | No BB Use<br>(N=998) | BB Use<br>(N=38)   | No BB Use<br>(N=21) |
| Age - yr                    | 58.8±13.8*           | 60.0±15.3            | 58.3±14.3          | 65.1±12.5           |
| Male sex - (%)              | 907 (68.3)*          | 642 (64.3)           | 26 (68.4)          | 12 (57.1)           |
| Ischemic etiology - (%)     | 692 (52.1)*          | 415 (41.6)           | 16 (42.1)          | 10 (47.6)           |
| NYHA functional class - (%) |                      |                      |                    |                     |
| II                          | 647 (48.8)           | 362 (36.3)           | 18 (47.4)          | 7 (33.3)            |
| III                         | 444 (33.5)*          | 349 (35.0)           | 10 (26.3)          | 3 (14.3)            |
| IV                          | 236 (17.8)           | 287 (28.8)           | 10 (26.3)          | 11 (52.4)           |
| Personal history - (%)      |                      |                      |                    |                     |
| Smoking                     | 540 (40.7)           | 370 (37.1)           | 14 (36.8)          | 4 (19.0)            |
| Hypertension                | 1160 (87.4)          | 874 (87.6)           | 32 (84.2)          | 20 (95.2)           |
| Hyperlipidemia              | 358 (27.0)*          | 224 (22.4)           | 10 (26.3)          | 1 (4.8)             |
| Diabetes                    | 410 (30.9)           | 331 (33.2)           | 9 (23.7)           | 8 (38.1)            |
| Stroke                      | 128 (9.6)            | 112 (11.2)           | 3 (7.9)            | 3 (14.3)            |
| Clinical testing            |                      |                      |                    |                     |
| Systolic pressure - mm Hg   | 131.3±24.6           | 130.8±26.1           | 138.4±28.0         | 132.3±23.5          |
| Diastolic pressure - mm Hg  | 80.5±15.9            | 80.0±16.5            | 86.1±18.7          | 79.4±11.4           |
| Heart Rate - beats/min      | 82.5±15.9            | 83.9±21.8            | 87.2±15.5          | 88.1±23.8           |
| Serum Creatinine - umol/L   | 84 (67-101)*         | 84 (67-116)          | 84 (73-143)        | 112 (73-269)        |

|                         |                              |                 |                        |                  |
|-------------------------|------------------------------|-----------------|------------------------|------------------|
| NT-proBNP - pg/mL       | 1428 (306-4458) <sup>*</sup> | 2402 (597-7668) | 1360 (560-4389)        | 8630 (853-34696) |
| LVEDD - mm              | 54 (47-64)                   | 55 (49-64)      | 56 (47-65)             | 57 (49-61)       |
| LAD - mm                | 39 (35-45)                   | 40 (35-46)      | 42 (36-48)             | 38 (33-43)       |
| Ejection fraction - (%) | 47 (32-62) <sup>*</sup>      | 47 (33-60)      | 38 (31-62)             | 43 (35-57)       |
| Medication - (%)        |                              |                 |                        |                  |
| Digoxin                 | 341 (25.7) <sup>*</sup>      | 208 (20.8)      | 10 (26.3)              | 4 (19.0)         |
| Diuretics               | 658 (49.6) <sup>*</sup>      | 414 (41.5)      | 21 (55.3)              | 10 (47.6)        |
| ACEI                    | 829 (62.5) <sup>*</sup>      | 498 (37.5)      | 29 (76.3) <sup>*</sup> | 7 (33.3)         |
| ARB                     | 198 (14.9) <sup>*</sup>      | 73 (7.3)        | 6 (15.8)               | 2 (9.5)          |
| Spironolactone          | 576 (43.4) <sup>*</sup>      | 336 (33.7)      | 18 (47.4)              | 8 (38.1)         |

---

NYHA = New York Heart Association; NT-proBNP = The N-terminal prohormone of brain natriuretic peptide; LVEDD =left ventricular end-diastolic dimension; LAD = left atrial dimension; BB = beta-blocker; ACEI = angiotensin-converting enzyme inhibitor; ARB = angiotensin receptor blocker;

<sup>\*</sup> P value<0.05 versus patients with no BB use of the same genotype

**Table S9. Characteristics of Heart Failure Subjects by  $\beta$ -blocker Use and *GRK5* Arg304His G>A Genotype**

| Characteristics             | GG Genotype (N=1305) |                      | GA Genotype (N=933) |                      | AA Genotype (N=148) |                     |
|-----------------------------|----------------------|----------------------|---------------------|----------------------|---------------------|---------------------|
|                             | BB Use<br>(N=725)    | No BB Use<br>(N=580) | BB Use<br>(N=553)   | No BB Use<br>(N=380) | BB Use<br>(N=87)    | No BB Use<br>(N=61) |
| Age - yr                    | 58.9±13.6            | 60.5±15.6            | 58.5±13.8           | 59.7±14.8            | 58.4±16.3           | 58.7±14.3           |
| Male sex - (%)              | 506 (69.8)*          | 369 (63.6)           | 374 (67.6)          | 237 (62.4)           | 53 (60.9)*          | 48 (78.7)           |
| Ischemic etiology - (%)     | 373 (51.4)*          | 239 (41.2)           | 285 (51.5)*         | 162 (42.6)           | 50 (57.5)*          | 25 (41.0)           |
| NYHA functional class - (%) |                      |                      |                     |                      |                     |                     |
| II                          | 360 (49.7)           | 207 (35.7)           | 262 (47.4)          | 144 (37.9)           | 43 (49.4)           | 18 (29.5)           |
| III                         | 236 (32.6)*          | 201 (34.7)           | 189 (34.2)*         | 127 (33.4)           | 29 (33.3)*          | 25 (41.0)           |
| IV                          | 129 (17.8)           | 172 (29.7)           | 102 (18.4)          | 109 (28.7)           | 15 (17.2)           | 18 (29.5)           |
| Personal history - (%)      |                      |                      |                     |                      |                     |                     |
| Smoking                     | 295 (40.7)           | 209 (36.0)           | 225 (40.7)          | 139 (36.6)           | 34 (39.1)           | 26 (42.6)           |
| Hypertension                | 625 (86.2)           | 498 (85.9)           | 489 (88.4)          | 347 (91.3)           | 133.4±25.4          | 134.6±26.8          |
| Hyperlipidemia              | 198 (27.3)*          | 130 (22.4)           | 142 (25.7)          | 84 (22.1)            | 28 (32.2)           | 12 (19.7)           |
| Diabetes                    | 210 (29.0)           | 192 (33.1)           | 176 (31.8)          | 124 (32.6)           | 33 (37.9)           | 24 (39.3)           |
| Stroke                      | 78 (10.8)            | 70 (12.1)            | 41 (7.4)            | 37 (9.7)             | 12 (13.8)           | 8 (13.1)            |
| Clinical testing            |                      |                      |                     |                      |                     |                     |
| Systolic pressure - mm Hg   | 131.8±25.0           | 130.0±22.4           | 130.8±24.2          | 131.6±24.9           | 133.4±25.4          | 134.6±26.8          |
| Diastolic pressure - mm Hg  | 81.0±16.6            | 79.3±16.1            | 80.3±15.5           | 80.3±15.9            | 80.3±13.7           | 83.2±21.8           |
| Heart Rate - beats/min      | 82.6±18.8            | 83.9±21.8            | 82.9±19.2           | 84.2±21.6            | 81.4±16.8           | 84.7±23.2           |
| Serum Creatinine - umol/L   | 84 (67-102)          | 83 (67-120)          | 83 (68-103)         | 86 (67-114)          | 84 (64-101)         | 85 (68-109)         |

|                         |                  |                 |                  |                 |                 |                 |
|-------------------------|------------------|-----------------|------------------|-----------------|-----------------|-----------------|
| NT-proBNP - pg/mL       | 1660 (325-4564)* | 2629 (659-7668) | 1315 (307-4387)* | 2257 (558-7259) | 1114 (280-4032) | 1531 (617-8925) |
| LVEDD - mm              | 55 (47-64)       | 55 (48-64)      | 54 (47-63)       | 56 (48-64)      | 53 (47-61)      | 55 (49-63)      |
| LAD - mm                | 39 (35-45)       | 40 (35-46)      | 40 (35-45)       | 40 (34-45)      | 39 (36-45)      | 42 (35-46)      |
| Ejection fraction - (%) | 47 (31-61)       | 47 (33-60)      | 50 (33-62)       | 45 (32-60)      | 54 (38-63)      | 54 (35-61)      |
| Medication - (%)        |                  |                 |                  |                 |                 |                 |
| Digoxin                 | 199 (27.4)*      | 115 (19.8)      | 130 (23.5)       | 83 (21.8)       | 22 (25.3)       | 14 (23.0)       |
| Diuretics               | 367 (50.6)*      | 240 (41.4)      | 268 (48.5)*      | 157 (41.3)      | 44 (50.6)       | 28 (45.9)       |
| ACEI                    | 473 (65.2)*      | 205 (35.3)      | 333 (60.2)*      | 155 (40.8)      | 52 (59.8)       | 28 (45.9)       |
| ARB                     | 95 (13.1)*       | 46 (7.9)        | 15 (17.2)*       | 2 (3.3)         | 15 (17.2)*      | 2 (3.3)         |
| Spironolactone          | 318 (43.9)*      | 192 (33.1)      | 41 (47.1)*       | 18 (29.5)       | 41 (47.1)*      | 18 (29.5)       |

NYHA = New York Heart Association; NT-proBNP = The N-terminal prohormone of brain natriuretic peptide; LVEDD =left ventricular end-diastolic dimension; LAD = left atrial dimension; BB = beta-blocker; ACEI = angiotensin-converting enzyme inhibitor; ARB = angiotensin receptor blocker;

\* P value<0.05 versus patients with no BB use of the same genotype



**Table S10. Characteristics of Heart Failure Subjects by  $\beta$ -blocker Use and *ADRB2* Genotype Groups**

| Characteristics             | Group A (N=883)   |                      | Group B (N=1078)  |                      | Group C (N=425)   |                      |
|-----------------------------|-------------------|----------------------|-------------------|----------------------|-------------------|----------------------|
|                             | BB Use<br>(N=513) | No BB Use<br>(N=370) | BB Use<br>(N=603) | No BB Use<br>(N=475) | BB Use<br>(N=249) | No BB Use<br>(N=176) |
| Age - yr                    | 58.6±14.1         | 59.0±14.9            | 59.0±13.6*        | 61.0±15.0            | 58.5±13.9         | 60.0±16.4            |
| Male sex - (%)              | 348 (67.8)        | 240 (64.9)           | 415 (68.8)*       | 295 (62.1)           | 170 (68.3)        | 119 (67.6)           |
| Ischemic etiology - (%)     | 269 (52.4)*       | 166 (44.9)           | 311 (51.6)*       | 185 (38.9)           | 128 (51.4)        | 75 (42.6)            |
| NYHA functional class - (%) |                   |                      |                   |                      |                   |                      |
| II                          | 257 (50.1)        | 144 (38.9)           | 290 (48.1)        | 155 (32.6)           | 118 (47.4)        | 70 (39.8)            |
| III                         | 173 (33.7)*       | 130 (35.1)           | 197 (32.7)*       | 174 (36.6)           | 84 (33.7)*        | 49 (27.8)            |
| IV                          | 83 (16.2)         | 96 (25.9)            | 116 (19.2)        | 146 (30.7)           | 47 (18.9)         | 57 (32.4)            |
| Personal history - (%)      |                   |                      |                   |                      |                   |                      |
| Smoking                     | 209 (40.7)        | 139 (37.6)           | 250 (41.5)*       | 168 (35.4)           | 95 (38.2)         | 67 (38.1)            |
| Hypertension                | 439 (85.6)        | 309 (83.5)           | 534 (88.6)        | 432 (90.9)           | 219 (88.0)        | 155 (88.1)           |
| Hyperlipidemia              | 140 (27.3)        | 93 (25.1)            | 148 (24.5)        | 101 (21.3)           | 80 (32.1)*        | 32 (18.2)            |
| Diabetes                    | 160 (31.2)        | 123 (33.2)           | 168 (27.9)*       | 161 (33.9)           | 91 (36.5)         | 56 (31.8)            |
| Stroke                      | 57 (11.1)         | 42 (11.4)            | 52 (8.6)          | 48 (10.1)            | 22 (8.8)          | 25 (14.2)            |
| Clinical testing            |                   |                      |                   |                      |                   |                      |
| Systolic pressure - mm Hg   | 131.8±24.8        | 132.6±26.3           | 131.4±24.8        | 129.6±25.3           | 131.2±24.3        | 130.8±26.9           |
| Diastolic pressure - mm Hg  | 80.7±16.8         | 80.8±17.0            | 80.8±15.4*        | 78.8±14.8            | 80.2±15.5         | 80.9±19.1            |
| Heart Rate - beats/min      | 82.3±18.3         | 83.0±22.4            | 83.3±19.7         | 84.0±20.6            | 81.7±17.8*        | 86.3±23.6            |
| Serum Creatinine - umol/L   | 82 (67-103)       | 83 (65-111)          | 83 (68-100)       | 82 (67-115)          | 87 (68-104)*      | 94 (75-133)          |

|                         |                  |                 |                  |                 |                  |                 |
|-------------------------|------------------|-----------------|------------------|-----------------|------------------|-----------------|
| NT-proBNP - pg/mL       | 1505 (362-4127)* | 2107 (544-6846) | 1419 (310-4578)* | 2450 (639-7378) | 1367 (292-4708)* | 2917 (702-9000) |
| LVEDD - mm              | 53 (47-64)       | 54 (48-63)      | 55 (47-64)       | 56 (49-64)      | 55 (47-63)       | 58 (49-66)      |
| LAD - mm                | 39 (35-45)       | 39 (34-45)      | 40 (35-45)       | 40 (36-46)      | 40 (35-45)       | 41 (35-48)      |
| Ejection fraction - (%) | 47 (32-62)       | 50 (35-61)      | 48 (32-62)       | 44 (32-58)      | 47 (33-62)       | 47 (32-60)      |
| Medication - (%)        |                  |                 |                  |                 |                  |                 |
| Digoxin                 | 139 (27.1)*      | 62 (16.8)       | 149 (24.7)       | 111 (23.4)      | 63 (25.3)        | 39 (22.2)       |
| Diuretics               | 249 (48.5)*      | 134 (36.2)      | 301 (49.9)*      | 206 (43.4)      | 129 (51.8)       | 85 (48.3)       |
| ACEI                    | 309 (60.2)*      | 140 (37.8)      | 384 (63.7)*      | 181 (38.1)      | 165 (66.3)*      | 67 (38.1)       |
| ARB                     | 74 (14.4)*       | 25 (6.8)        | 91 (15.1)*       | 30 (6.3)        | 39 (15.7)        | 20 (11.4)       |
| Spironolactone          | 226 (44.1)*      | 110 (29.7)      | 261 (43.3)*      | 170 (35.8)      | 107 (43.0)       | 64 (36.4)       |

NYHA = New York Heart Association; NT-proBNP = The N-terminal prohormone of brain natriuretic peptide; LVEDD =left ventricular end-diastolic dimension; LAD = left atrial dimension; BB = beta-blocker; ACEI = angiotensin-converting enzyme inhibitor; ARB = angiotensin receptor blocker

\* P value<0.05 versus patients with no BB use of the same genotype

**Table S11. Primary Endpoint According to *ADRB2* Arg16Gly (A>G) and  $\beta$ -Blocker Treatment in Validation Cohort**

|                                | <b>AA Genotype</b> | <b>AG/GG Genotype</b> | <b>HR<sup>§</sup> (95% CI)</b> |                |
|--------------------------------|--------------------|-----------------------|--------------------------------|----------------|
| <b>Outcome<sup>#</sup></b>     | <b>(N=324)</b>     | <b>(N=595)</b>        | <b>AG/GG VS. AA</b>            | <b>P value</b> |
| <b>BB Use</b>                  | 7 (4.6)            | 14 (5.0)              | 1.07 (0.43-2.65)               | 0.883          |
| <b>No BB Use</b>               | 11 (6.4)           | 36 (12.4)             | 2.09 (1.06-4.12)               | 0.034          |
| <b>HR<sup>*</sup> (95% CI)</b> | 0.86 (0.31-2.42)   | 0.49 (0.26-0.92)      | /                              | /              |
| <b>P value</b>                 | 0.774              | 0.026                 | /                              | /              |

<sup>#</sup>Outcome were presented as counts (percentage)

<sup>§</sup>HR, Hazard Ratios and P value were calculated with the use of stratified Cox proportional-hazard models adjusting with gender, age, and New York Heart Association functional class.

<sup>\*</sup>HR, Hazard Ratios and P value were calculated with the use of stratified Cox proportional-hazard models adjusting with gender, age, and New York Heart Association functional class and other drug treatments.

**Table S12. The Primer Sequences and Size of Amplicons in the First Re-sequencing Stage**

| Gene/Exon    | Sense primer                       | Anti-sense primer                | Amplicon size (bp) |
|--------------|------------------------------------|----------------------------------|--------------------|
| <b>ADRB1</b> |                                    |                                  |                    |
| E1           | 5' CGGGCTTCTGGGGTGTTTC 3'          | 5' GCGTCAGCAGGCTCTGGTAG 3'       | 587                |
| E2           | 5' CCAGCGAAAGCCCCGAG 3'            | 5' AACACCCGCAGGTACACGAA 3'       | 607                |
| E3           | 5' GCCCTGGTGTCTTCCTGC 3'           | 5' GCGTAGCCCAGCCAGTTGA 3'        | 545                |
| E4           | 5' GCCTCGTCCGTAGTCTCCTTC 3'        | 5' CACAGATCTCCTCGTTCCCCT 3'      | 815                |
| E5           | 5' GCCTTCAACCCCATCATCTACTG 3'      | 5' CTCCCATCCCTTCCCAAACCTT 3'     | 502                |
| <b>ADRB2</b> |                                    |                                  |                    |
| E1           | 5' GAATGAGGCTTCCAGGCGTC 3'         | 5' GGCATAGGCTTGGTTCGTGA 3'       | 703                |
| E2           | 5' CGGTCACCAACTACTTCATCACTTC<br>3' | 5' CATCCTGCTCCACCTGGCTAA 3'      | 558                |
| E3           | 5' CTTACCTCCTTCTTGCCCATTCA 3'      | 5' CCCTGTGTTGCCGTTGCTG 3'        | 597                |
| E4           | 5' ATTCTGGTTTCAATCCCCTTAT 3'       | 5' AAATAGTCTGTTTAGTGTTCTGTTGG 3' | 348                |
| <b>GRK2</b>  |                                    |                                  |                    |
| E1           | 5' GCCGACGTGAGCTACCTGATG 3'        | 5' GGGACCGATGGGGCAGAG 3'         | 335                |
| E2           | 5' CACCACCACAGTGCCCTCAG 3'         | 5' CAAAAACCCCAAAGGAGGAACT 3'     | 434                |
| E3           | 5' GCCACCTCCATAGCCAGTTCT 3'        | 5' CTCCGTCTCCAGCTTCTCGTAC 3'     | 357                |
| E4           | 5' GGGGCGGCTTTGTGGAAC 3'           | 5' CCCGAGAGACCGTGTTGC 3'         | 480                |
| E5           | 5' GGAGGAGGAGCGTGTGGC 3'           | 5' CCCCAGAGACCGTGTT 3'           | 363                |
| E6           | 5' GAAGAGAGGACCCTGCTGAGAAT 3'      | 5' AGCCCACGGGAGAGAAAGAG 3'       | 612                |
| E7           | 5' CAAGATTGTGCCACAGCCCT 3'         | 5' AAATGAACTGTTTCCCACCGC 3'      | 441                |
| E8           | 5' AGGTAAATATGTGGCAAGGATGG 3'      | 5' CAGCACGGCAAGACAGGAGT 3'       | 350                |
| E9           | 5' ACACGCTGGTCTGGGTCTA 3'          | 5' GGGGCGGGCAGTTAGC 3'           | 271                |
| E10          | 5' GCCGCTGAGGCTCTGGA 3'            | 5' CTCTGAGAAGACCCCGTGCT 3'       | 289                |

|      |                                |                                  |     |
|------|--------------------------------|----------------------------------|-----|
| E11  | 5' TTCCACACGCCAGACAAGC 3'      | 5' AGAGGACAGCCACGGAGGT 3'        | 317 |
| E12  | 5' CCCACCTTTGCCCTTTCTTTG 3'    | 5' CGTGGGTGCCCTGTGG 3'           | 300 |
| E13  | 5' CGTGTGAGTGCCCCCA 3'         | 5' ACTTCTCTTAGCCCCAACCCA 3'      | 228 |
| E14  | 5' GGCACCGTCCCTGACTTTG 3'      | 5' GGCTGGTGGGAAGCAAGAGT 3'       | 251 |
| E15  | 5' CGCCCTCCCCGTGCT 3'          | 5' CTGGCCATGCCCAACTTA 3'         | 389 |
| E16  | 5' GCCCAAGTTCACAGAGCCAGA 3'    | 5' TCGTGGGGGGATCAGCG 3'          | 268 |
| E17  | 5' CCCTGGACTGGCAGATGG 3'       | 5' GCTGGCACAGGGTCTCACA 3'        | 305 |
| E18  | 5' TTGCACTGACCATCCCTACCC 3'    | 5' GGTGAGTTCCTTAAACCCGAGC 3'     | 351 |
| E19  | 5' CAAGATTGTGCCACAGCCCT 3'     | 5' AAATGAACTGTTTCCCACCGC 3'      | 441 |
| E20  | 5' CAGTGGCAGCGGCGG 3'          | 5' GCCCCTCGGCCCTCC 3'            | 314 |
| E21  | 5' CGATGTGAGTGGGGGCTGA 3'      | 5' GGGAAAACAATAATAAAAATTCGACA 3' | 330 |
| GRK5 |                                |                                  |     |
| E1   | 5' GAGGAGAATGGAGTGACAGAGACA 3' | 5' CATCCAAATCCCTGCAACCT 3'       | 580 |
| E2   | 5' GTCTTGGGCTGGGGGTGT 3'       | 5' ACTGTGTCCACTGATTGGCATT 3'     | 373 |
| E3   | 5' TGAGAGTTTGCCAGTCACCTTC 3'   | 5' CTCCCATAATAACCCAGGCTTC 3'     | 528 |
| E4   | 5' TTTGGACTAAACATCGGGGC 3'     | 5' CAGGAGGTCAACAACAGCCAC 3'      | 386 |
| E5   | 5' GGAGCGTGGCTGGTTCTTG 3'      | 5' TCTTTGGACTTGGCACCTTGAT 3'     | 384 |
| E6   | 5' ATGCCAACCCTTGCTCC 3'        | 5' AAAATGTGTACCCTCTGCCTCC 3'     | 402 |
| E7   | 5' GTCCAGTCTCCAGCGATGATTC 3'   | 5' CCACTGACTCTCTCCCACCCT 3'      | 379 |
| E8   | 5' TTATCTAAGCCTTGGTGTGAGTGG 3' | 5' CGTGTGATGGAGGAATGTCTTG 3'     | 586 |
| E9   | 5' ACGCCATTCTGTTGGATTCAC 3'    | 5' CCCACCCCTCGGACTTA 3'          | 519 |
| E10  | 5' CAAACCAGACAGCCTGAGCC 3'     | 5' ACAACAAGATGAGAGGTGGAGAAC 3'   | 555 |
| E11  | 5' GGACAGATGAGAATGCCGAGA 3'    | 5' CCAGACCCCTGCTTCAATGT 3'       | 524 |

|     |    |                        |    |    |                        |    |     |
|-----|----|------------------------|----|----|------------------------|----|-----|
| E12 | 5' | AGGAGAGTCATCAGGGCAAGC  | 3' | 5' | TGTTCCCCTCACCCCTCTTC   | 3' | 620 |
| E13 | 5' | CCCAGGAACGAGGTCTGTAATC | 3' | 5' | ACAGGGAGGAAACTGACGCTT  | 3' | 679 |
| E14 | 5' | GGTCGCACAAAAAACCACAG   | 3' | 5' | CCTCCTTCCACCCGTCAGTC   | 3' | 448 |
| E15 | 5' | ATGAAGGCAGCACACAAAAGC  | 3' | 5' | GGCGGAGAAACCCAGAGG     | 3' | 586 |
| E16 | 5' | TGCTCTTCTCCCGTGTTACAGG | 3' | 5' | AGGGGCTCCACTACTTCCACTT | 3' | 543 |

---

**Table S13. The Sequences of Primers and Taqman Probes for Genotyping**

| <b>Gene</b> | <b>Polymorphism</b> | <b>sequences</b> |                              |
|-------------|---------------------|------------------|------------------------------|
| ADRB2       | Arg16Gly            | forward primer   | 5' GGCAGCGCCTTCTTGCT 3'      |
|             |                     | reverse primer   | 5' AGGACGATGAGAGACATGACGA 3' |
|             |                     | probe1           | FAM- ACCCAATAGAAGCCA –MGB    |
|             |                     | probe2           | HEX- ACCCAATGGAAGCC -MGB     |
| ADRB2       | Gln27Glu            | forward primer   | 5' GCCCACCACCCACACCT 3'      |
|             |                     | reverse primer   | 5' TTCTTGCTGGCACCCAATG 3'    |
|             |                     | probe1           | FAM- TCCCTTTGCTGCGTGA –MGB   |
|             |                     | probe2           | HEX- TCCCTTTCCTGCGTGA-MGB    |
| GRK5        | Gln41Leu            | forward primer   | 5' CAGCTTACCTATGGTCCTTCGG 3' |
|             |                     | reverse primer   | 5' AGGCATCTTTTTCCCATCTCT 3'  |
|             |                     | probe1           | FAM- CTTCACACTGGCTAAT –MGB   |
|             |                     | probe2           | HEX- CTTCACACAGGCTAAT-MGB    |
| GRK5        | Arg304His           | forward primer   | 5' AGATCCTCTGCGGCTTAGAAGA 3' |
|             |                     | reverse primer   | 5' AGGACGATGAGAGACATGACGA 3' |
|             |                     | probe1           | FAM- ACCCAATAGAAGCCA –MGB    |
|             |                     | probe2           | HEX- ACCCAATGGAAGCC -MGB     |

ADRB1 Arg389Gly C>G was synthesized by Invitrogen Company and the product ID is 8898494\_10

**Table S14. The Basic Characteristics of the Patients Enrolled for the Lymphocytes Experiments**

| Characteristic              | Genotype of ADRB2 Arg16Gly A>G |                  |                 | P Value |
|-----------------------------|--------------------------------|------------------|-----------------|---------|
|                             | AA<br>(n=10)                   | AG<br>(n=10)     | GG<br>(n=6)     |         |
| age - yr                    | 56.9±13.5                      | 69.2±11.7        | 56.2±8.9        | 0.050   |
| Male sex - (%)              | 9 (90)                         | 7 (70)           | 4 (66.7)        | 0.452   |
| Ischemic etiology - (%)     | 2 (20)                         | 5 (50)           | 5 (83.3)        | 0.046   |
| NYHA functional class - (%) |                                |                  |                 |         |
| II                          | 4 (40)                         | 4 (40)           | 2 (33.3)        |         |
| III                         | 3 (30)                         | 4 (40)           | 2 (33.3)        | 0.973   |
| IV                          | 3 (30)                         | 2 (20)           | 2 (33.3)        |         |
| Personal history - (%)      |                                |                  |                 |         |
| Smoking                     | 6 (60)                         | 0 (0)            | 3 (50)          | 0.012   |
| Hypertension                | 10 (100)                       | 9 (90)           | 4 (66.7)        | 0.127   |
| Hyperlipidemia              | 3 (30)                         | 3 (30)           | 1 (16.7)        | 0.812   |
| Diabetes                    | 3 (30)                         | 4 (40)           | 3 (50)          | 0.723   |
| Stroke                      | 0 (0)                          | 1 (10)           | 0 (0)           | 0.435   |
| Clinical testing            |                                |                  |                 |         |
| Systolic pressure - mm Hg   | 128.8±22.8                     | 122.2±27.2       | 120.0±19.3      | 0.435   |
| Diastolic pressure - mm Hg  | 85.6±15.9                      | 88.0±29.2        | 81.5±5.5        | 0.836   |
| Heart Rate - beats/min      | 80.8±15.7                      | 87.3±31.8        | 86.3±17.9       | 0.813   |
| Serum Creatinine - umol/L   | 80 (72-90)                     | 89 (64-116)      | 78 (48-106)     | 0.880   |
| NT-proBNP - pg/mL           | 1613 (444-6410)                | 1860 (1268-4335) | 4919 (272-7827) | 0.860   |
| LVEDD - mm                  | 60 (51-63)                     | 57 (51-67)       | 72 (68-77)      | 0.017   |



|                       |            |            |            |       |
|-----------------------|------------|------------|------------|-------|
| LAD - mm              | 46 (37-50) | 37 (33-48) | 45 (39-52) | 0.674 |
| Ejection fraction - % | 34 (26-44) | 38 (33-51) | 29 (23-40) | 0.100 |
| Medication            |            |            |            |       |
| Digoxin               | 5 (50)     | 3 (30)     | 4 (66.7)   | 0.346 |
| Diuretics             | 6 (60)     | 6 (60)     | 4 (66.7)   | 0.958 |
| ACEI                  | 6 (60)     | 7 (70)     | 5 (83.3)   | 0.618 |
| Beta-blocker          | 4 (40)     | 8 (80)     | 5 (88.3)   | 0.098 |
| Spirolactone          | 5 (50)     | 5 (50)     | 3 (50)     | 1.000 |

---

NYHA = New York Heart Association; NT-proBNP = The N-terminal prohormone of brain natriuretic peptide;

LVEDD =left ventricular end-diastolic dimension; LAD = left atrial dimension; ACEI = angiotensin-converting enzyme inhibitor.

Fig. S1

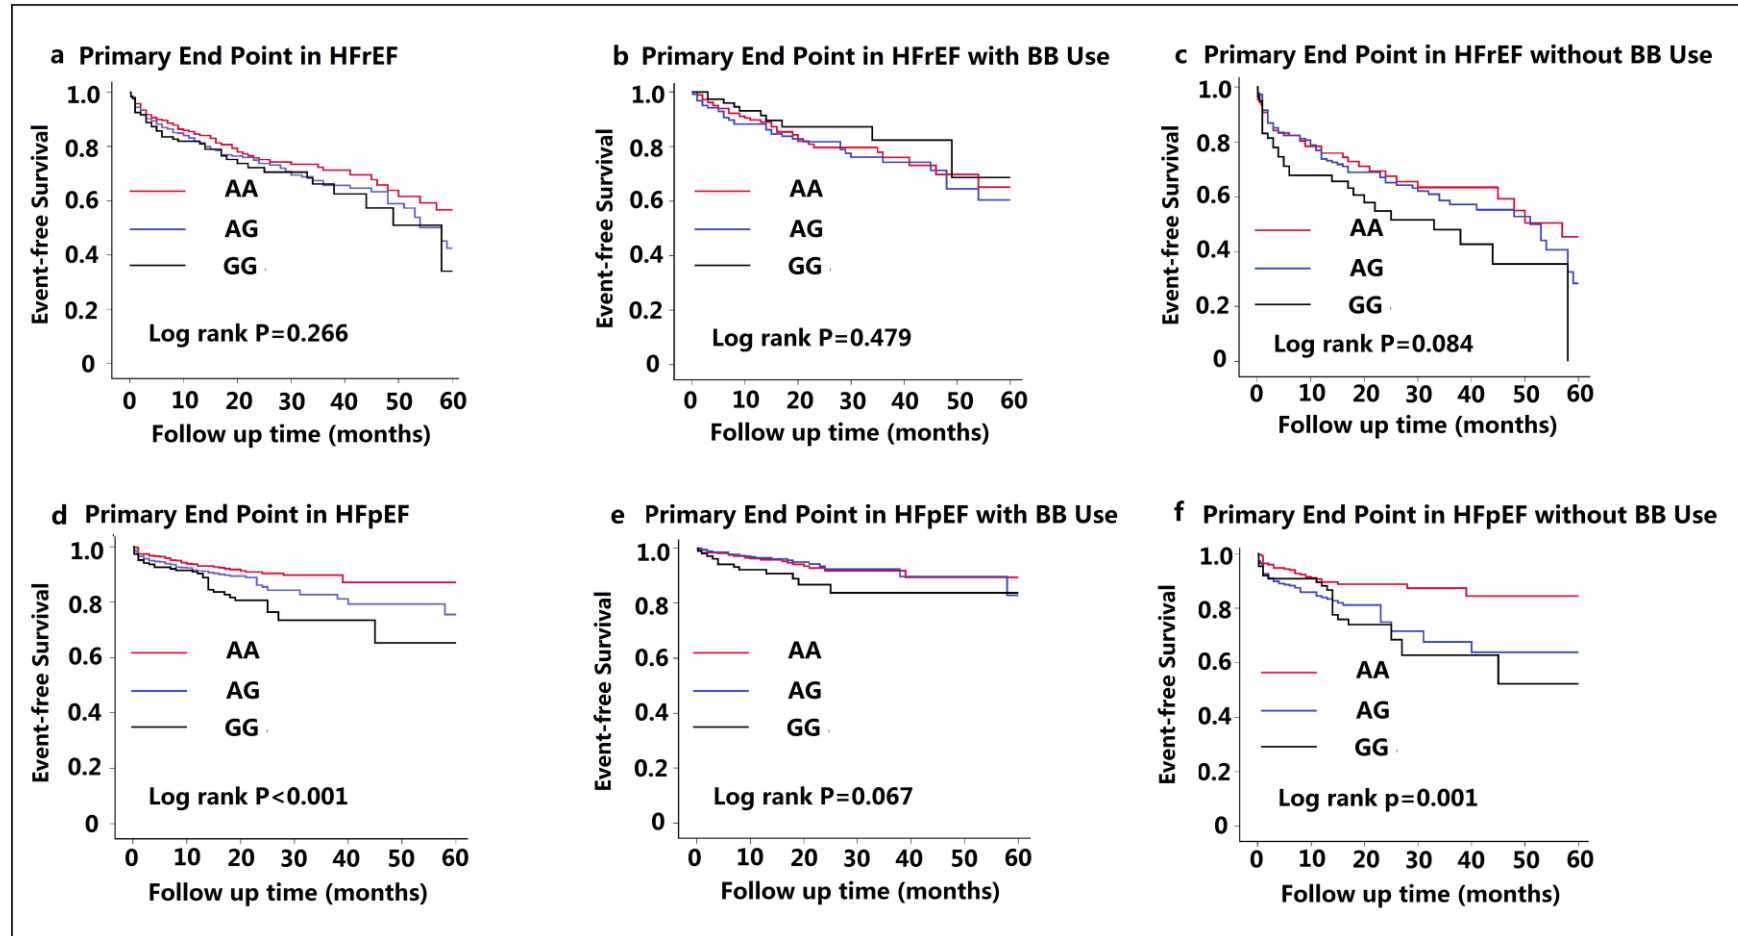

**Fig. S1. The Primary Endpoint in Subgroups Stratified by Left Ventricular Ejection Fraction**

Kaplan-Meier curves demonstrating that the primary composite end point did not varied among the groups of patients with the different *ADRB2* Arg16Gly genotype in the subgroup of patients with reduced ejection fraction (EF<40%, that is HFrEF) with log rank p=0.266 (a). The genotype of *ADRB2* Arg16Gly site did not predict the risk of primary end point for the patients with (b) or without (c) the treatment of  $\beta$ -blockers (Log rank p=0.479 and 0.084 respectively). In the subgroup of patients with preserved ejection fraction (EF $\geq$ 40%, that is HFpEF), the primary endpoint significantly varied in different genotype groups with log rank p<0.001 (d). The genotype dependent variability in prognosis was still significant in the subgroup of patients without  $\beta$ -blockers (log rank p=0.001, f), while disappeared in the subgroup of patients with  $\beta$ -blocker treatment (log rank p=0.067, e).

Fig. S2

**a. Deaths from Cardiovascular Causes**

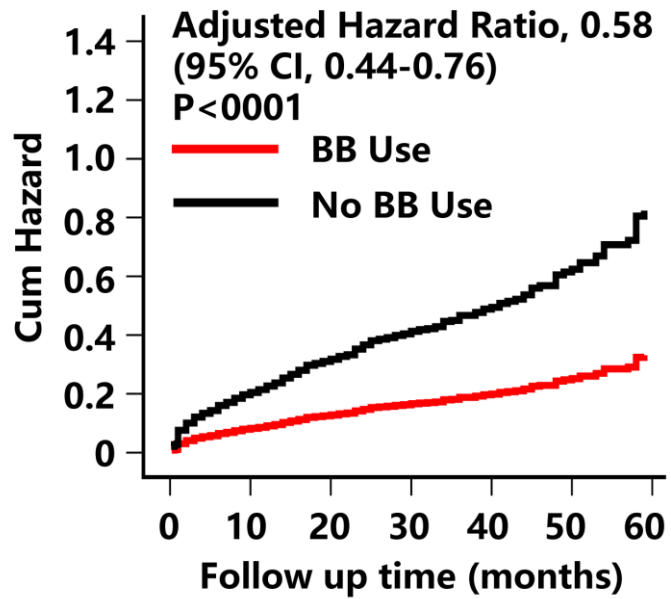

**b. Cardiovascular Rehospitalizations**

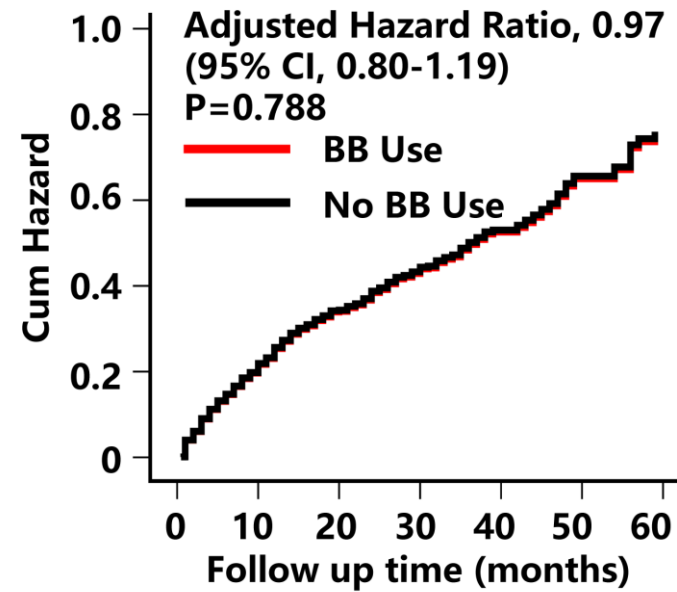

**Fig. S2. Effects of  $\beta$ -Blocker Treatment on Cardiovascular Deaths and Rehospitalization in Heart Failure**

Among the entire cohort,  $\beta$ -blocker treatment (indicated in red) was significantly associated with a reduced risk of (a) the individual end point of death from a cardiovascular cause (adjusted HR, 0.58; 95% CI, 0.44 to 0.76;  $P < 0.001$ ), but not (b) the risk of rehospitalization owing to a cardiovascular cause (adjusted HR, 0.97; 95% CI, 0.80 to 1.19;  $P = 0.788$ ). Abbreviations: CI, confidence interval; HR, hazard ratio.

Fig. S3

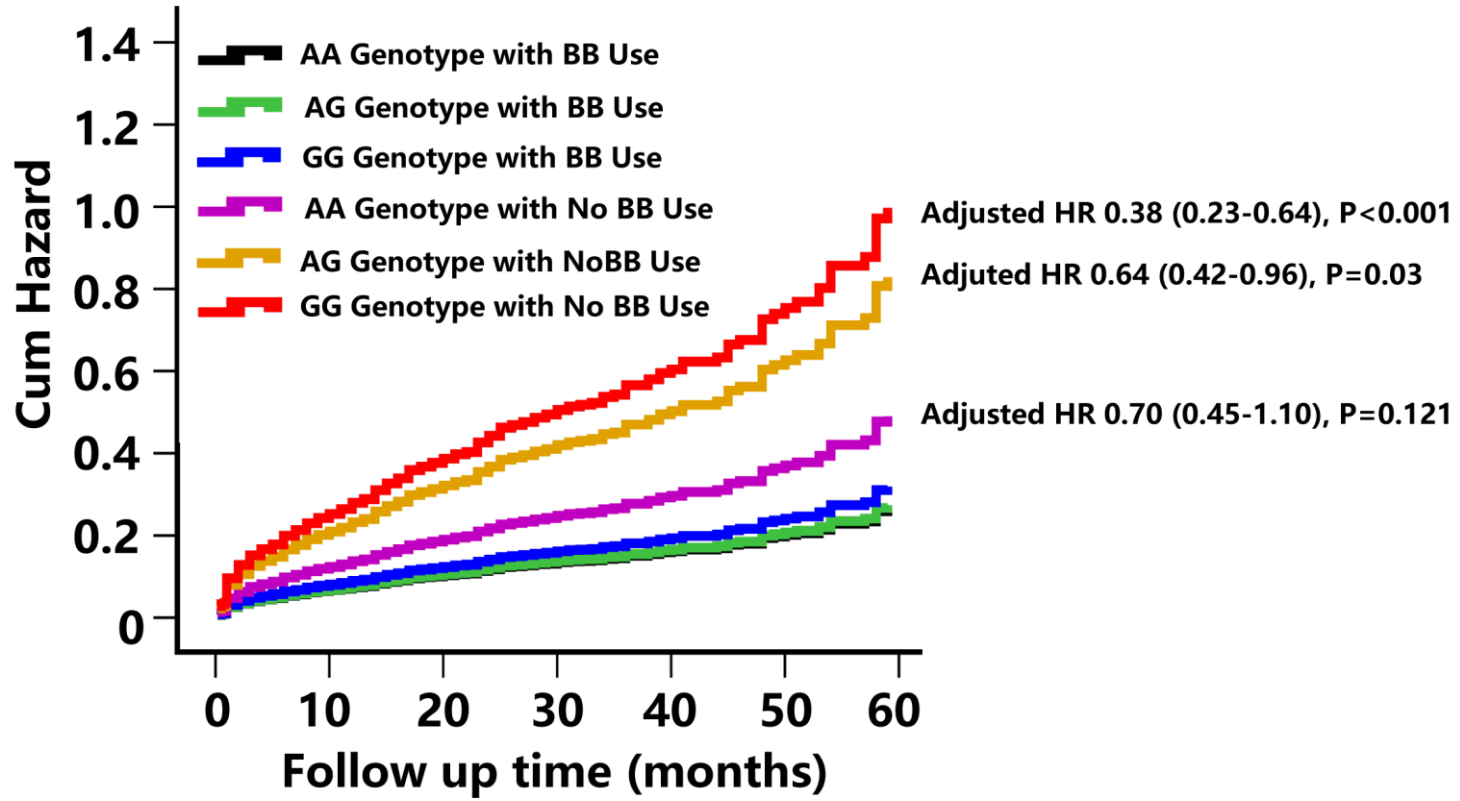

**Fig. S3 Response to  $\beta$ -blocker of Patients with Different Genotype of *ADRB2* Arg16Gly**

Carriers of the risk G allele (Gly16) were benefited from  $\beta$ AR-blocker treatment in an allele-dose-dependent manner. The cumulative hazard curves for the AA homozygotes with and without  $\beta$ -blocker treatment (BB) are in black and in purple, respectively; those for AG heterozygotes are in green and in orange, and those for the GG homozygotes are in blue and in red.

Fig. S4

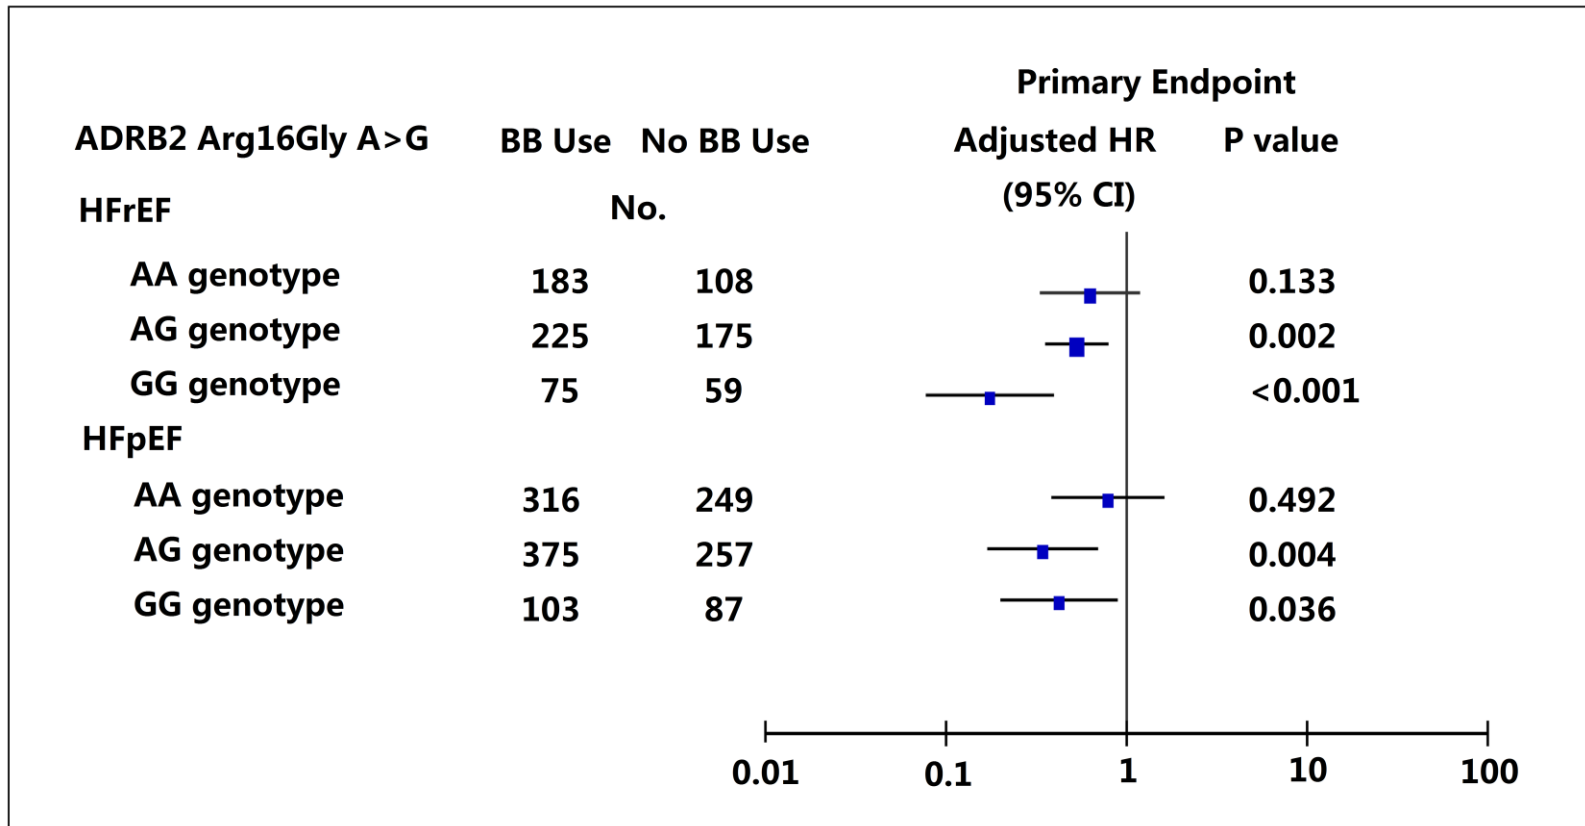



**Fig. S4. Effects of  $\beta$ -Blocker Treatment on the Primary Endpoint in the Subgroups Stratified by Left Ventricular Ejection Fraction**

Patients who are homozygous for Arg16 genotype (AA genotype) of *ADRB2* Arg16Gly site showed no response to  $\beta$ -blockers no matter whether their ejection fractions were reduced or preserved (adjusted HR=0.62, 95%CI 0.33 to 1.16, P=0.133 and adjusted HR=0.78, 95% CI 0.38-1.59, P=0.492 respectively). However, Gly16 carriers (AG and GG genotype) were good responders to  $\beta$ -blockers no matter whether the patients had reduced (adjusted HR=0.54, 95% CI 0.36-0.80, P=0.002 for AG genotype and adjusted HR=0.17, 95% CI 0.08-0.40, P<0.001 for GG genotype) or preserved (adjusted HR=0.36, 95% CI 0.18-0.72, P=0.004 and adjusted HR=0.46, 95% CI 0.22-0.95, P=0.036) ejection fractions.

**Fig. S5**

Bright field

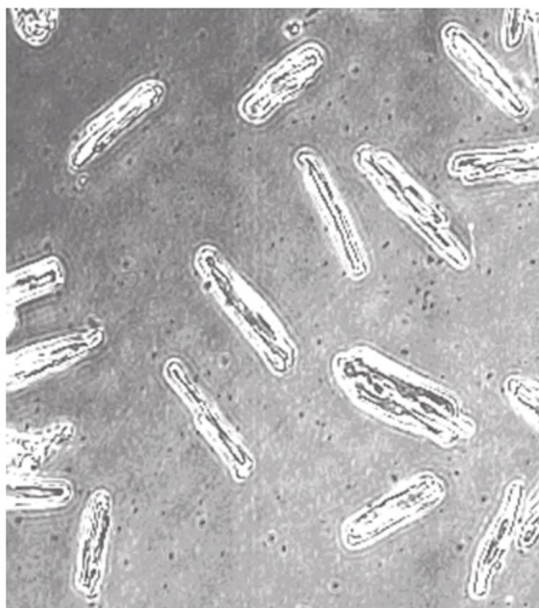

Fluorescent field

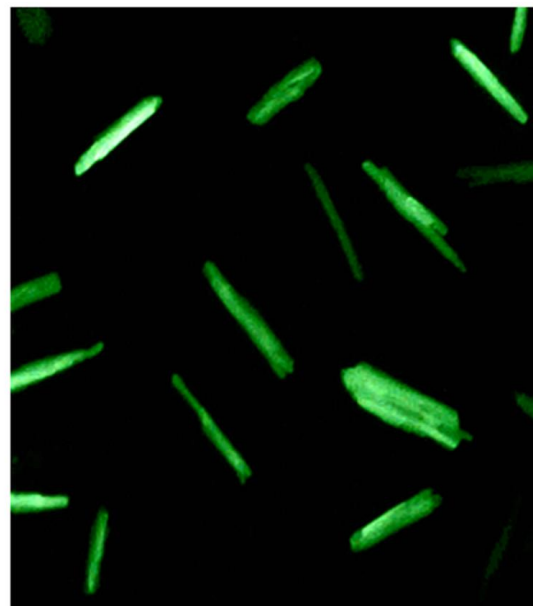

**Fig. S5. Transduction Efficiency of the Adeno-GFP by Means of Fluorescent Microscopy.**

A transduction efficiency of more than 90% was obtained with Adeno-GFP at 100 multiplicity of infection (moi) in rat cardiac myocytes.

The transduction method had a low toxicity since more than 90% of the transduced cells maintained a healthy rod-shape morphology.

Fig. S6

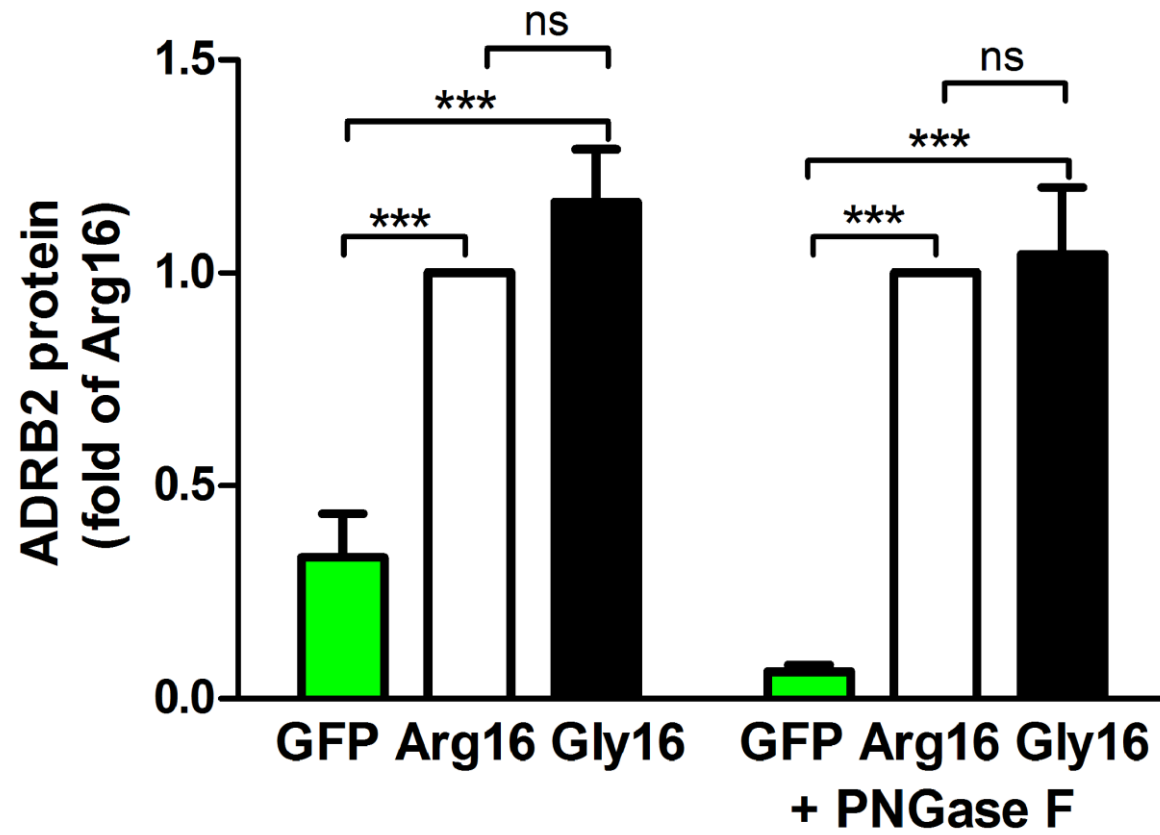

**Fig. S6. Expression Levels of  $\beta$ 2AR with Different Genotypes at the *ADRB2* Arg16Gly Locus**

The expression of  $\beta$ 2AR in rat cardiac myocytes infected with 100 moi of adenoviruses encoding for GFP, *ADRB2*-Arg16 or *ADRB2*-Gly16 was detected by Western blotting method. Averaged data of band intensities are shown. Expression levels are presented as fold change of the *ADRB2*-Arg16 group (Means  $\pm$  SEM, N=7-10). No differences were found (by unpaired Student's *t*-test) between the *ADRB2*-Arg16 group and the *ADRB2*-Gly16 group for samples with and without deglycosylation treatment with PNGase F. \*\*\*:  $P < 0.001$ , ns:  $P > 0.05$ .

Fig. S7

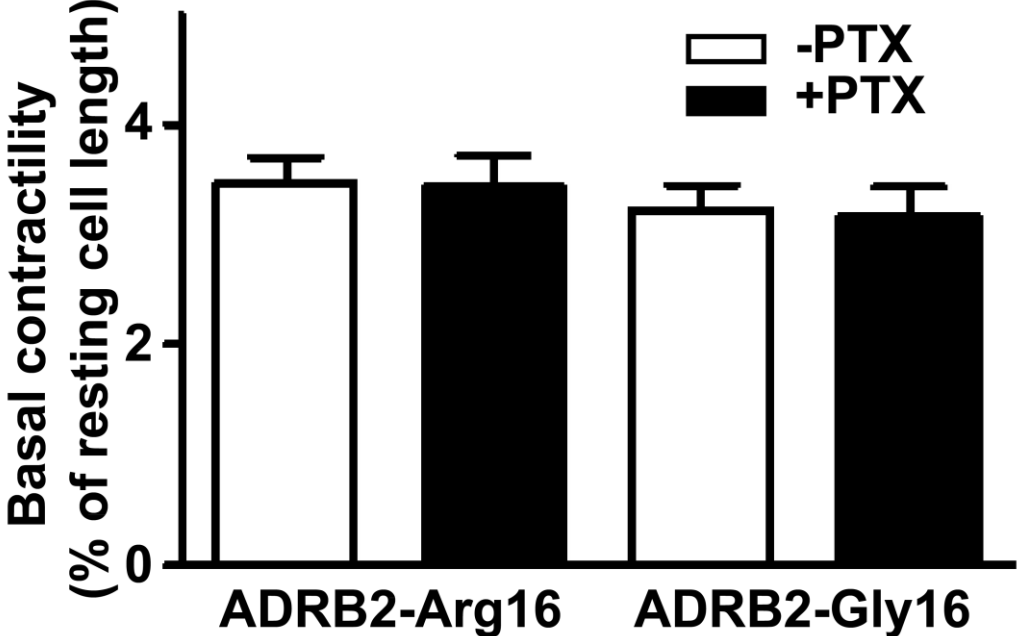

**Fig. S7. Basal Contractilities of Cultured ADRB2 Knockout Mouse Cardiomyocytes after Adenoviral Gene Transfer of ADRB2-Arg16 or ADRB2-Gly16 and Treatment with Pertussis Toxin (PTX).** Data are Means  $\pm$  SEM (N=30-41 cells from 4 mice for each data point).
